# Supplementary material for: Promising ferroelectric and piezoelectric response of Cr-doped ZnO nanofiller-incorporated PVDF flexible and laminated nanocomposite system
Source: Royal Society of Chemistry journal article supplement (doi:10.1039/d4cp02963a), 2024-01-01
Supplement: d4cp02963a1.pdf [file d4cp02963a1.pdf]

# Promising ferroelectric and piezoelectric response of Cr doped ZnO nanofillers incorporated PVDF flexible and laminated nanocomposite system

Tanmoy Chakraborty<sup>1</sup>, Suman Saha<sup>1</sup>, Dhananjoy Mondal<sup>1</sup>, Subhojit Dutta<sup>1</sup>, Abhik Sinha Mahapatra<sup>2</sup>, Kishan Gupta<sup>1</sup>, Partha Sona Maji<sup>3</sup>, Sukhen Das<sup>1</sup>, Soumyaditya Sutradhar<sup>1\*</sup>

<sup>1</sup>Department of Physics, Jadavpur University, Kolkata-700032, West Bengal, India

<sup>2</sup>Department of Physics, JIS University, Kolkata-700109, West Bengal, India

<sup>3</sup>Department of Physics, Amity University, Kolkata-700135, West Bengal, India

\*Corresponding author: sds.phy1@gmail.com (Dr. Soumyaditya Sutradhar).

## S1. Materials and Methods

### S1.1. Synthesis of Cr<sup>3+</sup> ions doped ZnO (Cr<sub>0.05</sub>Zn<sub>0.95</sub>O) nanoparticles

In this article we have selected two different types of synthesis technique to prepare the Cr<sup>3+</sup> ions doped ZnO nanoparticles, one is co-precipitation method and another one is hydrothermal method. Cr<sup>3+</sup> ions doped ZnO nano seeds were synthesised via simple co-precipitation method and the rod-like structure of Cr<sup>3+</sup> ions doped ZnO nanoparticles have been synthesised via hydrothermal method. In our earlier publication we have discuss about the details of co-precipitation synthesis [1] as well as hydrothermal method [2]. Both the as prepared Cr<sup>3+</sup> ions doped ZnO nanoparticles synthesized by co-precipitation and hydrothermal method annealed at 400 °C and lastly mortared to obtain the final Cr<sup>3+</sup> ions doped ZnO nanoparticles.

## S2. Results and discussions

### S2.1. Theoretical Density Functional Theory calculations

Table: 1 Electrical property calculated by Density Functional Theory

| Parameters            | CZC  | CZH     |
|-----------------------|------|---------|
| Dipole moment (Debye) | 1.32 | 7.44851 |

|                                                                  |            |            |
|------------------------------------------------------------------|------------|------------|
| <b>Quadrapole moment (C m<sup>2</sup>)</b>                       | - 26.39912 | - 29.52106 |
| <b>Isotropic polarizability (C m<sup>2</sup> V<sup>-1</sup>)</b> | 44.12189   | 248.9692   |

---

## S2.2. Geometrical positions of elements

### CARTESIAN COORDINATES (ANGSTROEM) (CZC)

Zn 0.160044 1.648698 1.378628

O 1.833116 0.785019 1.218045

Zn 1.590998 0.949587 3.082747

O -0.081959 1.812846 3.243300

### CARTESIAN COORDINATES (ANGSTROEM) (CZH)

Zn 0.580049 1.521871 3.150615

O 1.361890 1.688837 1.557517

Zn 1.711864 0.379310 0.380806

O -0.151604 1.606131 4.715273

## S2.3. FTIR study

In the present article, to understand the modulation and enhancement of the electroactive  $\beta$ -phase of PVDF due to the incorporation of Cr<sup>+3</sup> doped ZnO nanocomposites prepared by two wet chemical synthesis routes, the FTIR spectroscopy study is performed for all the samples. Figure 1: shows the FTIR spectra of PVDF, CZCP1, CZCP2, CZHP1 and CZHP2, within the range of 1200 cm<sup>-1</sup> to 400 cm<sup>-1</sup>. Prominent peaks distinctive of nonpolar  $\alpha$ -phase of PVDF which match with CF<sub>2</sub> wagging, CF<sub>2</sub> bending, CF<sub>2</sub> bending and skeletal bending, and CH<sub>2</sub> rocking has been observed in the FTIR spectra. Also, distinctive peaks corresponding to CF<sub>2</sub> bending, CH<sub>2</sub> rocking, and skeletal C-C stretching of polar  $\beta$ -phase of PVDF has also been observed in Figure 1. The distinctive peaks of the  $\alpha$ - and  $\beta$ - phases are prominent in all the

samples. The  $\beta$ -phase fraction [F( $\beta$ )%] of PVDF, CZCP1, CZCP2, CZHP1 and CZHP2 has been calculated using the Lambert-Beer law,

$$F(\beta) = \frac{A_{\beta}}{\left(\frac{K_{\beta}}{K_{\alpha}}\right)A_{\alpha} + A_{\beta}}$$

(1)

where,  $A_{\alpha}$  and  $A_{\beta}$  are the corresponding absorbance values of PVDF, CZCP1, CZCP2, CZHP1, and CZHP2 at 769 and 845  $\text{cm}^{-1}$ , respectively, while  $K_{\alpha}$  ( $6.1 \times 10^4 \text{ cm}^2 \text{ mol}^{-1}$ ) and  $K_{\beta}$  ( $7.7 \times 10^4 \text{ cm}^2 \text{ mol}^{-1}$ ) are the absorption coefficients at the respective wavenumbers. The development of  $\beta$ -phase fraction of CZCP1, CZCP2, CZHP1 and CZHP2 with respect to bare PVDF is depicted in Fig xx. From Fig xx, it is observed that the F( $\beta$ )% of bare PVDF is  $\sim 43.86\%$ . It is also observed that there is a significant enhancement of the F( $\beta$ )% of the nanocomposite films CZCP1, CZCP2, CZHP1 and CZHP2 as compared to bare PVDF which is shown in Figure 1. The enhancement of the  $\beta$ -phase in the nanocomposite films can be attributed to the interaction of the nanofillers and the  $\text{CH}_2$  groups of PVDF, which transforms significant number of PVDF chains to attain the all-trans-planar zigzag (TTTT) conformation hence enhancing the  $\beta$ -phase fraction [5-7]. This enhancement of the electroactive  $\beta$ -phase of PVDF in CZCP1, CZCP2, CZHP1 and CZHP2 will play a significant role in the enhancement of the total polarization response of the nanocomposite films.

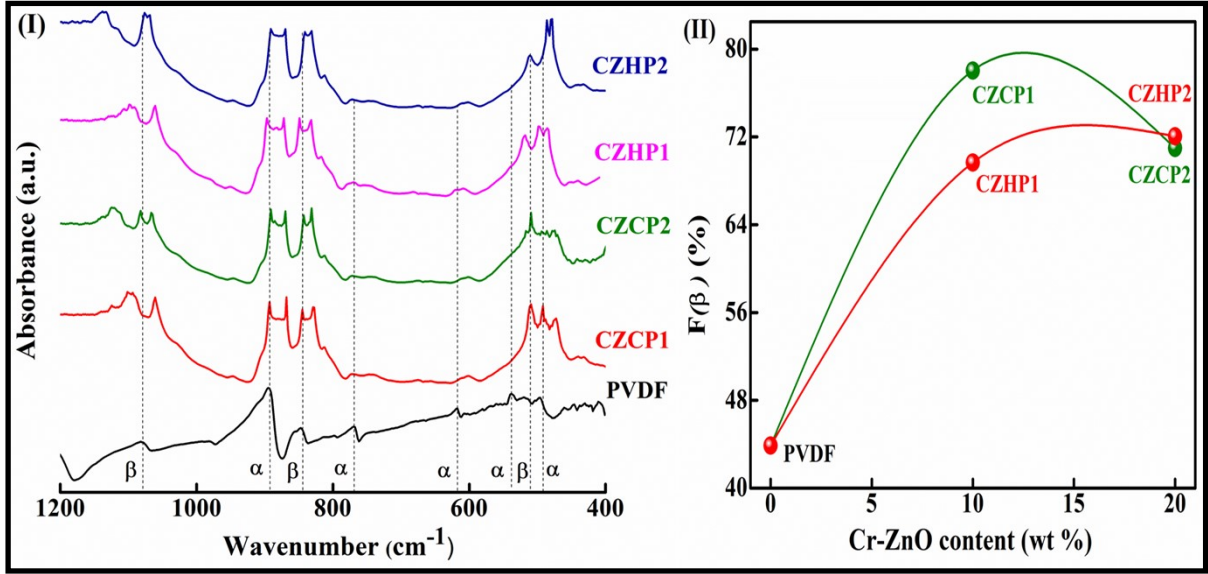

**Figure 1:** (I) FTIR spectra and (II)  $\beta$  percentage of bare PDVF, CZCP1, CZCP2, CZHP1 and CZHP2 nanocomposite films

#### S2.4. Calculation of force for piezoelectric energy generation

The amount of force imparted on the device has been calculated by the energy conservation law. At first, we know,

$$mgh = \frac{mv_2^2}{2} \quad (2)$$

Where  $m$  is the mass of a striking object,  $v$  is velocity,  $h$  is the height of the object from where it falls, and  $g$  is the acceleration due to gravity.

Velocity has been calculated in the above equation for the height of 15cm and found to be 1.715 m/s.

Now, the equation of momentum is:

$$mv = (F - mg)\Delta t \quad (3)$$

Therefore, the applied force  $F$  is:

$$F = m\left(\frac{v}{\Delta t} + g\right)$$

(4)

where  $\Delta t$  is the full width at half maxima (impulsive time) of the output voltage vs the time graph [Figure: 2].

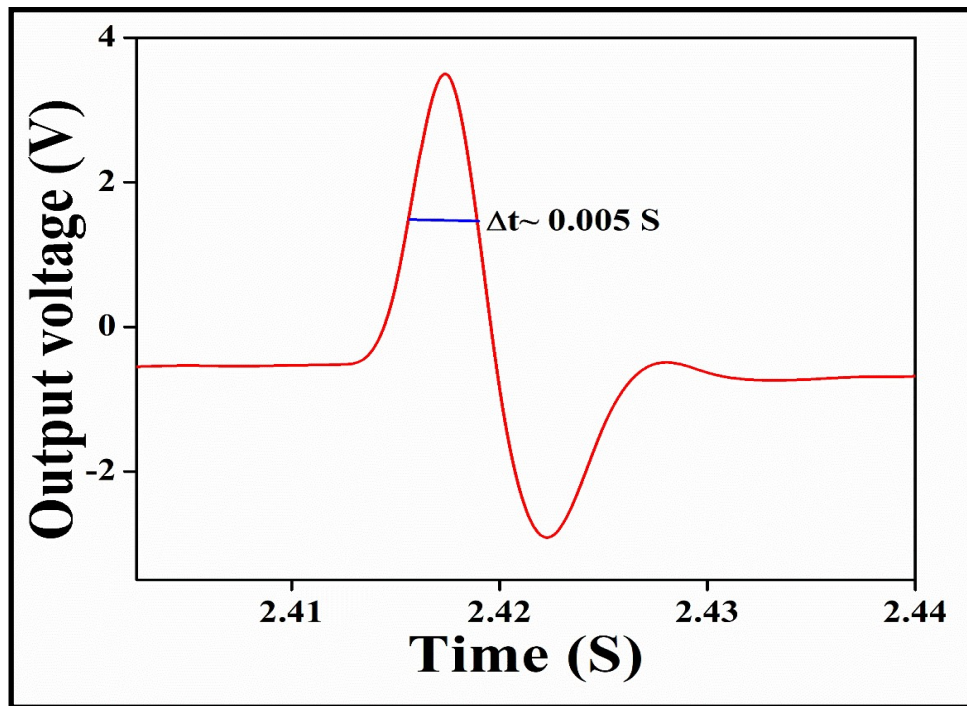

**Figure 2:** Full width at half maxima ( $\Delta t$ ) from the time vs voltage plot of the device

The output piezoelectric voltage has been estimated by exerting force by finger tapping where  $m$  is 0.035 kg,  $v$  is  $1.715 \text{ ms}^{-1}$ ,  $h$  is 0.15 m,  $g$  is  $9.8 \text{ m/s}^2$ , and  $\Delta t$  is 0.005 s. Putting these values into relation, the applied force on the device is found to be 12.35 N.

#### References:

- [1] S. Das, A. Bandyopadhyay, P. Saha, S. Das and S. Sutradhar. *J. Alloys Compd.* 2018, **749**, 1-9.
- [2] T. Debnath, T. Chakraborty, A. Bandyopadhyay, K. Das, S. Singh, S. Saha, A. Saha, R. R. Bhattacharjee, S. Das and S. Sutradhar. *Mater. Chem. Phys.* 2023, **296**, 127284.
